# Supplementary material for: Freestanding 3D mesoporous graphene oxide for high performance energy storage applications
Source: Royal Society of Chemistry journal article supplement (doi:10.1039/c4ra08519a), 2014-01-01
Supplement: c4ra08519a1.pdf [file c4ra08519a1.pdf]

**Electronic Supplementary Materials**

**Freestanding 3D mesoporous graphene oxide for high  
performance energy storage applications**

*Zijiong Li<sup>a</sup> \*, Baocheng Yang<sup>b</sup>, Yanzhen Guo<sup>b</sup>, Xiaowei Lv<sup>b</sup>, Jiejie Zhang<sup>b</sup>, Gaoqian*

*Yun<sup>a</sup>, Yuling Su<sup>a</sup>,*

*<sup>a</sup>School of Physics & Electronic Engineering, Zhengzhou University of Light Industry,*

*Zhengzhou, 450002, PR China*

*<sup>b</sup>Institute of Nano Functional Materials, Huanghe University of Science &*

*Technology, Zhengzhou 450006, PR China*

## 1. Supplementary Information

**Materials.** Graphite powders (325 mesh, 99.995%) was purchased from Alfa Aesar. All other reagents were commercially available and analytic grade and were used directly without any purification. Double distilled water was used throughout the experiments.

**Synthesis of graphene oxide (GO).** GO was prepared from graphite powder (Aldrich, <20um) by the modified Hummers method. Briefly, graphite powder (5.0 g) and 130 mL of concentrated H<sub>2</sub>SO<sub>4</sub> were added into a 1 L flask until the powder was completely dispersed. The flask was then cooled to 0°C using a water-ice bath. A 15.0 g of KMnO<sub>4</sub> powder was added to the cold reaction mixture, which was allowed to warm to room temperature. The temperature was then raised to 35°C and the mixture was stirred for 2 h. The reaction mixture was cooled with an ice bath again, which was then diluted with 230 mL of water. To the diluted mixture, about 10 mL of H<sub>2</sub>O<sub>2</sub> was added until evolution of gas was ceased. The mixture is allowed to settle for about 24 h. After settling, the clear supernatant was decanted. The remaining mixture was centrifuged and washed with a diluted HCl solute (10 % v/v) and a mixed solution containing CH<sub>3</sub>OH and water (50% v/v) several times. The resulting graphene oxide (GO) was freeze-drying under vacuum at room temperature for 24 h, yielding about 6.0 g of dark brown powders.

## 2. Supplementary Figures

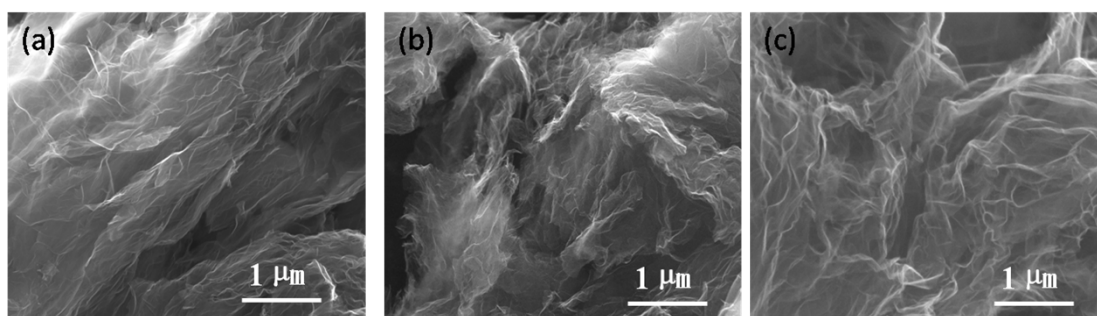

Fig.S1 SEM images of (a) CRGO-10, (b) CRGO-30, and (c) RGO.

**Table S1** Comparison of capacitive performance based on graphene materials in the literatures.

| Samples                            | Synthesis methods                         | Electrolyte                         | $C_s$<br>(F g <sup>-1</sup> ) | Ref. |
|------------------------------------|-------------------------------------------|-------------------------------------|-------------------------------|------|
| 3D a-MEGO                          | KOH activation                            | BMIMBF <sub>4</sub> /AN             | 165                           | [1]  |
| 3D-GFs                             | Soft template                             | 1 M H <sub>2</sub> SO <sub>4</sub>  | 226                           | [2]  |
| 3D-graphene hydrogel               | Hydrothermal reduction                    | H <sub>2</sub> SO <sub>4</sub> -PVA | 186-196                       | [3]  |
| 3D HPG                             | Heating ion-exchanged resin               | TEMABF <sub>4</sub> /PC             | 178                           | [4]  |
| 3D macroporous graphene frameworks | Template by polystyrene spheres           | 1 M Na <sub>2</sub> SO <sub>4</sub> | 202                           | [5]  |
| Non-stacked RGO                    | Anti-solvent method                       | 6 M KOH                             | 236.8                         | [6]  |
| Porous graphene                    | MgO template                              | 6 M KOH                             | 303                           | [7]  |
| Curved graphene                    | Thermal reduction                         | EMIMBM <sub>4</sub>                 | 100                           | [8]  |
| Functionalized graphene            | Mg(OH) <sub>2</sub> template              | 6 M KOH                             | 456                           | [9]  |
| Porous graphene                    | CO <sub>2</sub> -activated                | 1 M H <sub>2</sub> SO <sub>4</sub>  | 278.5                         | [10] |
| Restacking inhibited 3D RGO        | Thermal reduction of melamine-mediated GO | LiPF <sub>6</sub>                   | 210                           | [11] |
| HPGN                               | Silica nanoparticles template             | 1 M H <sub>2</sub> SO <sub>4</sub>  | 492                           | [12] |

|                 |                                        |         |     |              |
|-----------------|----------------------------------------|---------|-----|--------------|
| Prous graphene  | CVD and Far-infrared reduction         | 6 M KOH | 320 | [13]         |
| Porous graphene | CO reduced, repaired, and<br>activated | 6 M KOH | 291 | This<br>work |

## References

- [1] Y. W. Zhu, S. Murali, M. D. Stoller, K. J. Ganesh, W. W. Cai, P. J. Ferreira, A. Pirkle, R. M. Wallace, K. A. Cychoz, M. Thommes, D. Su, E. A. Stach and R. S. Ruoff, *Science*, 2011, 332, 1537.
- [2] Z.S. Wu, Y. Sun, Y.Z. Tan, S. Yang, X. Feng and K. Müllen, *J. Am. Chem. Soc.*, 2012, 134, 19532
- [3] Y. Xu, Z. Lin, X. Huang, Y. Liu, Y. Huang and X. Duan, *ACS Nano*, 2013, 7, 4042.
- [4] Y. Li, Z. Li and P. K. Shen, *Adv. Mater.*, 2013, 25, 2474.
- [5] B. G. Choi, M. Yang, W. H. Hong, J. W. Choi and Y. S. Huh, *ACS Nano*, 2012, 6, 4020
- [6] Y. Yoon, K. Lee, C. Baik, H. Yoo, M. Min, Y. Park, S. M. Lee and H. Lee, *Adv. Mater.*, 2013, 25, 4437.
- [7] H.J. Wang, X.X. Sun, Z.H. Liu, and Z.B. Lei, *Nanoscale*, 2014, 6, 6577.
- [8] C. Liu, Z. Yu, D. Neff, A. Zhamu and B. Z. Jang, *Nano Lett.*, 2010, 10, 4863.
- [9] J. Yan, Q. Wang, T. Wei, L.L. Jiang, M. L. Zhang, X.Y. Jing, Z. J. Fan. *ACS Nano*, 2014, 8, 4720.
- [10] S. Yun, S-O. Kang, S. Park, H.S. Park. *Nanoscale*, 2014, 6, 5296.
- [11] J. H. Lee, N. Park, B. G. Kim, D. S. Jung, K. Im, J. Hur and J. W. Choi, *ACS*

*Nano*, 2013, 7, 9366.

[12] D. Mhamane, A. Suryawanshi, S. M. Unni, Dr. C. Rode, Dr. S. Kurungot, S. Ogale. *Small*, 9, 2801.

[13] F. Xiang, J. Zhong, N.Y. Gu, R. Mukherjee, IL-K. Oh, N. Koratkar, Z.Y. Yang. *Carbon*, 2014, 201.
